# Supplementary material for: An acridinium-based sensor as a fluorescent photoinduced electron transfer probe for proton detection modulated by anionic micelles
Source: Royal Society of Chemistry journal article supplement (doi:10.1039/c4ob00559g), 2014-06-30
Supplement: c4ob00559g1.pdf [file c4ob00559g1.pdf]

## Supporting information

### **Acridinium-Based Sensor as Fluorescent Photoinduced Electron Transfer Probe for Proton Detection Modulated by Anionic Micelles**

Stefano Basili, Tiziana Del Giacco,\* Fausto Elisei, and Raimondo Germani

Dipartimento di Chimica, Biologia e Biotecnologie and Centro di Eccellenza Materiali Innovativi Nanostrutturati (CEMIN), Università di Perugia, Via Elce di sotto 8, 06123, Perugia, Italy

tiziana.delgiacco@unipg.it

#### Table of Contents

|                                                                                                                                                       |     |
|-------------------------------------------------------------------------------------------------------------------------------------------------------|-----|
| <sup>1</sup> H and <sup>13</sup> C NMR spectra of compounds                                                                                           | S2  |
| HPLC-HRMS analysis of Acr <sup>+</sup> -A Cl <sup>-</sup>                                                                                             | S7  |
| Figure S1. Relative fluorescence emission at 490 nm of Acr <sup>+</sup> -A in H <sub>2</sub> O as a function of pH.                                   | S8  |
| Figure S2. Fluorescence spectra of Acr <sup>+</sup> -A in H <sub>2</sub> O at different pH, λ <sub>exc</sub> = 355 nm.                                | S8  |
| Figure S3. Laser flash photolysis of Acr <sup>+</sup> -A in N <sub>2</sub> -saturated H <sub>2</sub> O at pH 8.0 and 12.                              | S9  |
| Figure S4. Absorption spectra of Acr <sup>+</sup> -A at pH 5.90 in H <sub>2</sub> O in the presence of CTAB and SB3-14.                               | S9  |
| Figure S5. Fluorescence spectra of Acr <sup>+</sup> -A at pH 5.90 in H <sub>2</sub> O, in the presence of CTAB and SB3-14, λ <sub>exc</sub> = 445 nm. | S10 |
| Figure S6. Absorption spectra of Acr <sup>+</sup> -A in H <sub>2</sub> O, in the presence of SDS at different pH.                                     | S10 |
| Figure S7. Absorption spectra of Acr <sup>+</sup> -A in H <sub>2</sub> O, in the presence of SOBS at different pH.                                    | S11 |
| Figure S8. Relative fluorescence emission at 490 nm of Acr <sup>+</sup> -A in the presence of SDS as a function of pH.                                | S11 |
| Figure S9. Relative fluorescence emission at 490 nm of Acr <sup>+</sup> -A in the presence of SOBS as a function of pH.                               | S12 |

$^1\text{H}$  and  $^{13}\text{C}$  NMR spectra of compounds

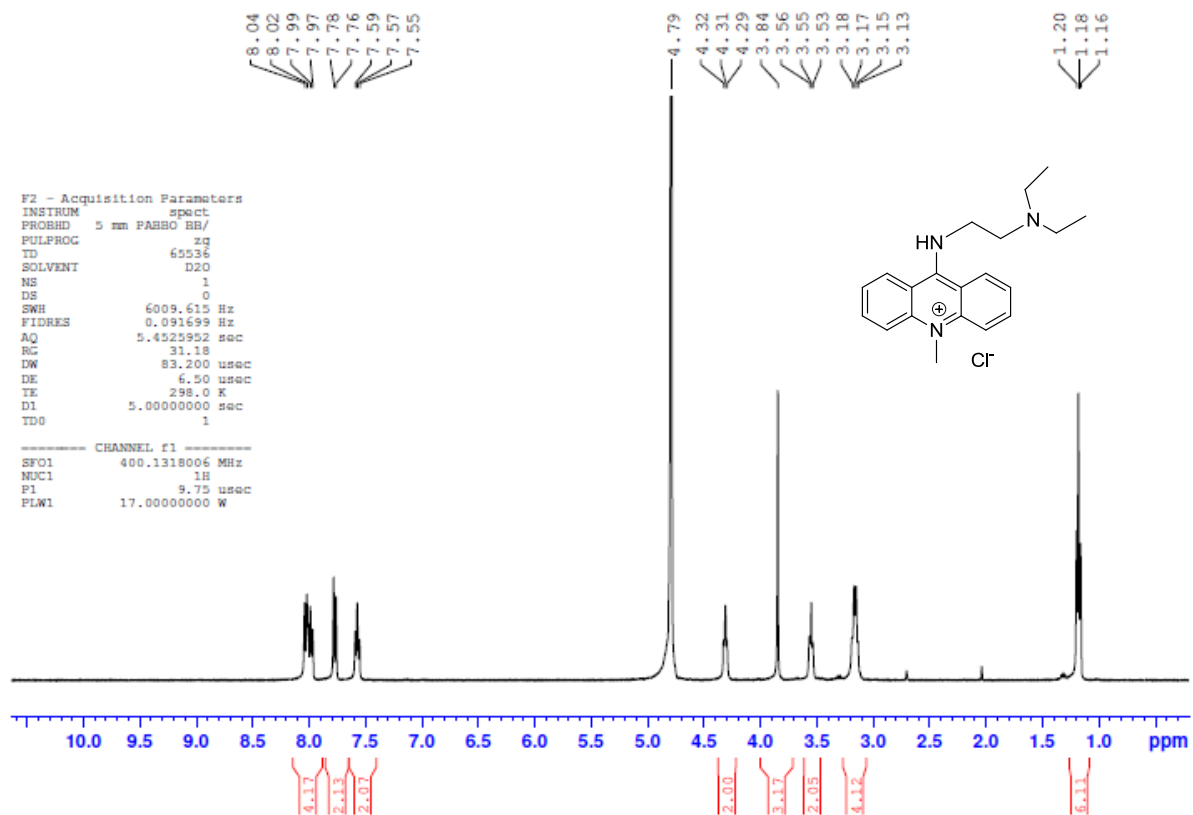

$^1\text{H}$  NMR spectrum ( $\text{D}_2\text{O}$ , 400 MHz) of  $\text{Acr}^+\text{-A Cl}^-$ .

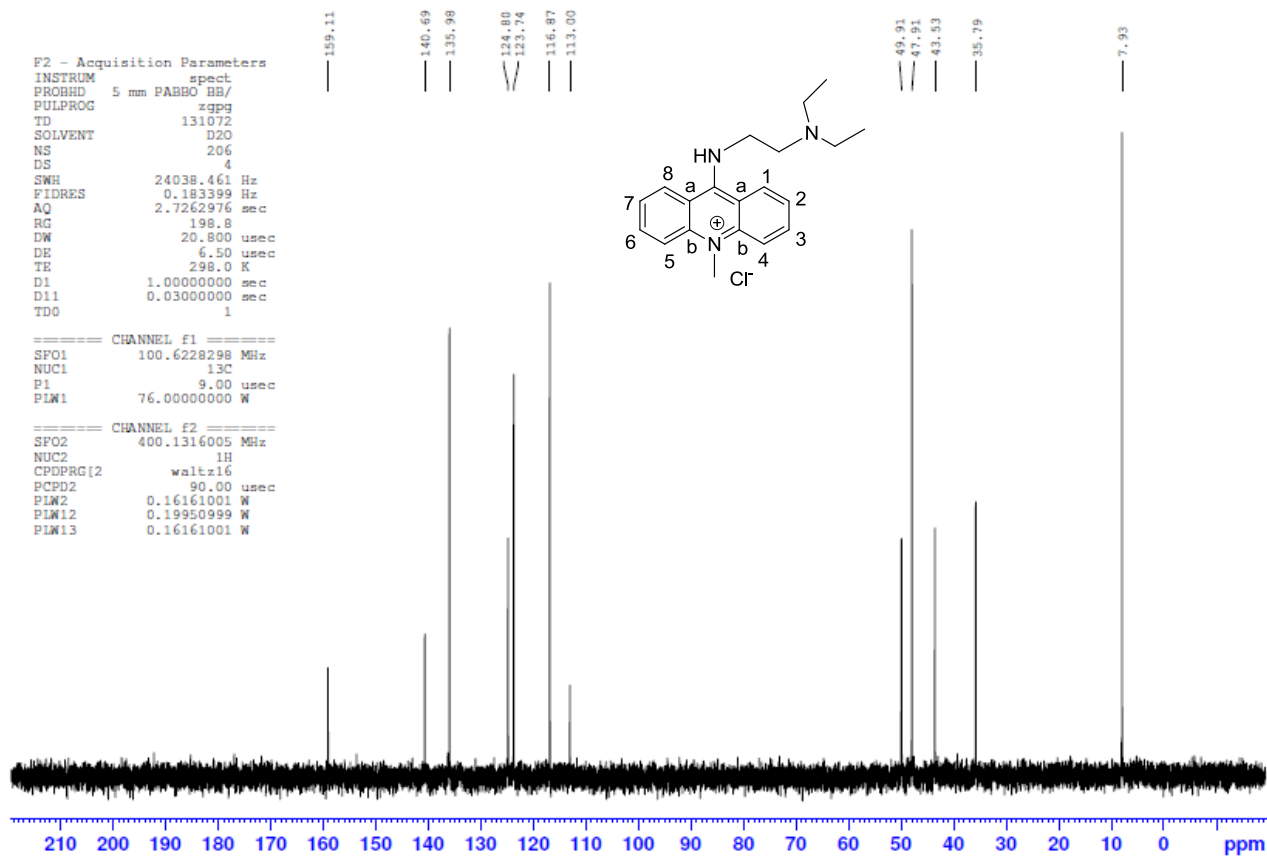

$^{13}\text{C}$  NMR spectrum ( $\text{D}_2\text{O}$ , 400 MHz) of  $\text{Acr}^+\text{-A Cl}^-$ .

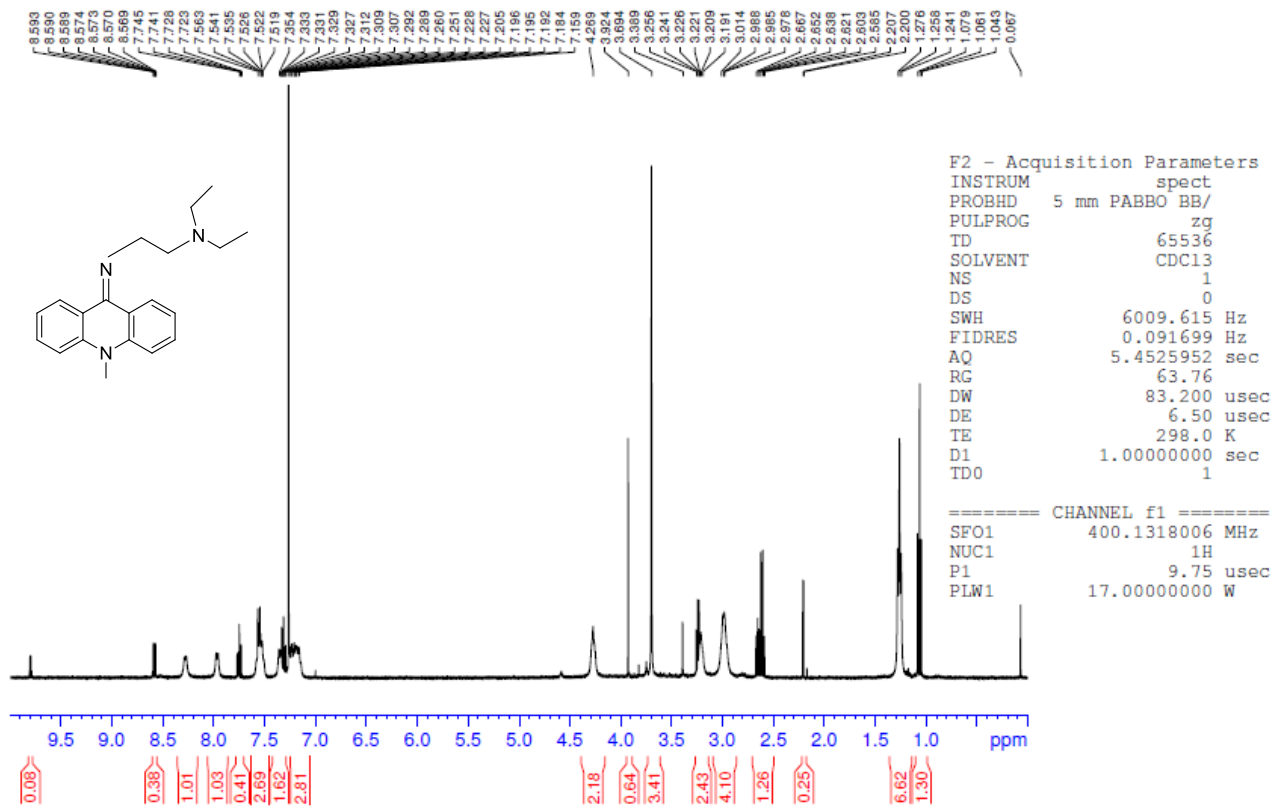

<sup>1</sup>H NMR spectrum (CDCl<sub>3</sub>, 400 MHz) of (Acr-H)-A in mixture with the corresponding hydrolysis products, identified as 10-methyl-9(10H)-acridone and [2-(diethylamino)ethyl]amine.

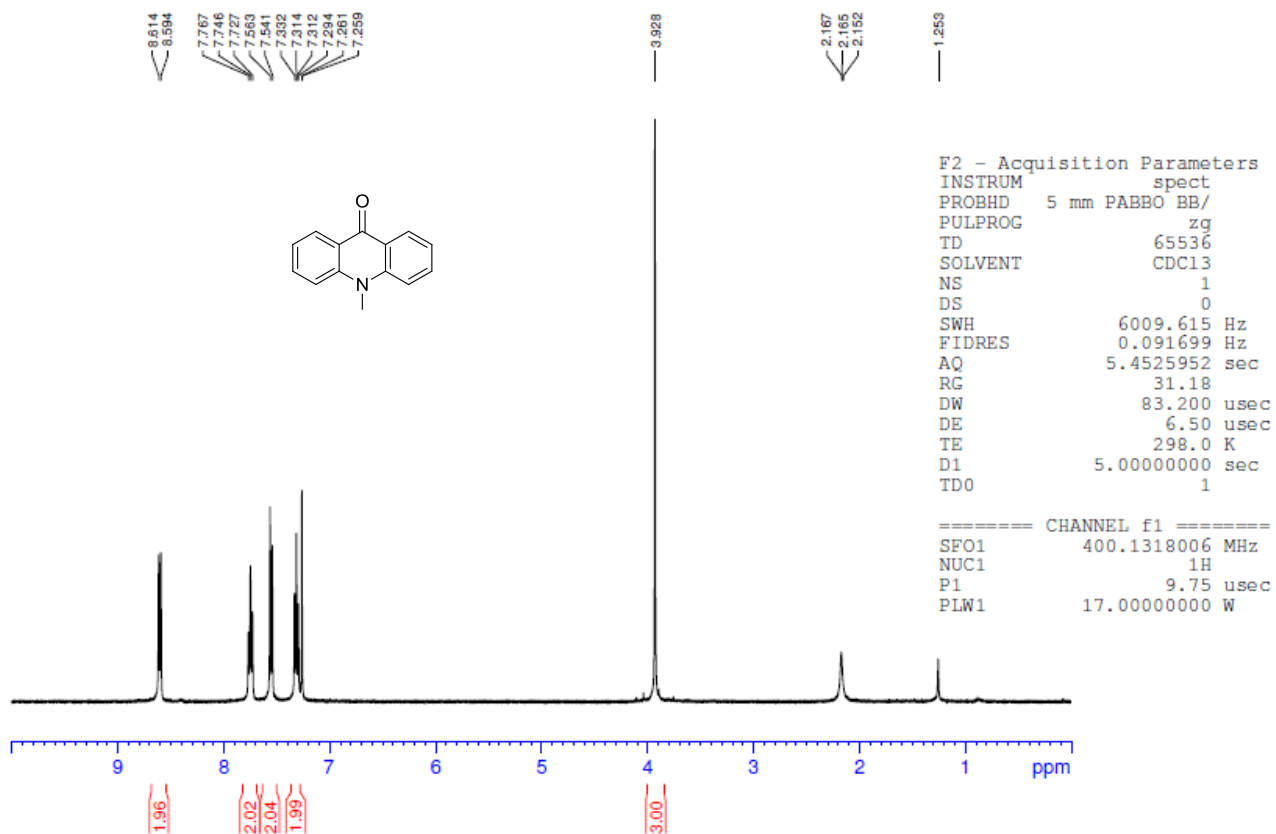

<sup>1</sup>H NMR spectrum (CDCl<sub>3</sub>, 400 MHz) of 10-methyl-9(10H)-acridone.

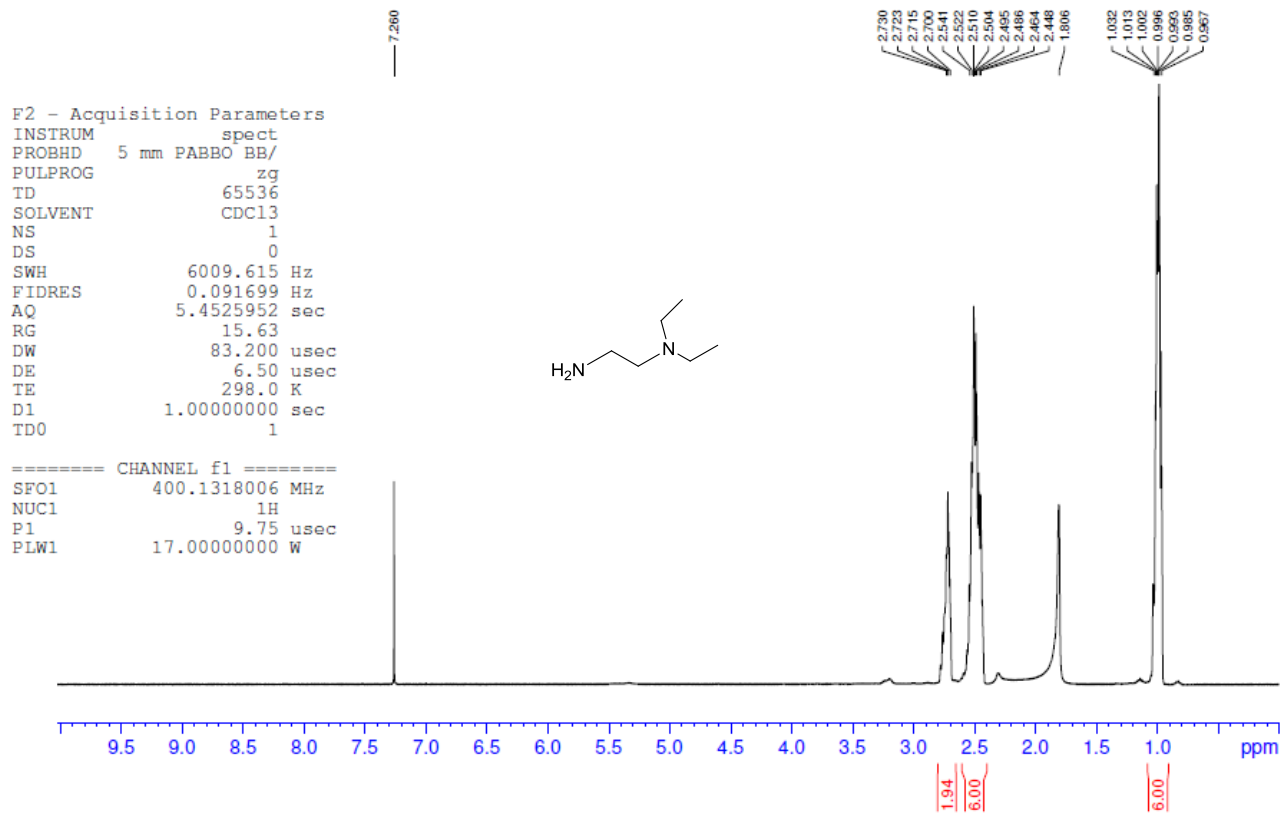

<sup>1</sup>H NMR spectrum (CDCl<sub>3</sub>, 400 MHz) of [2-(diethylamino)ethyl]amine.

# HPLC-HRMS analysis of Acr<sup>+</sup>-A Cl<sup>-</sup>

Chromatogram:

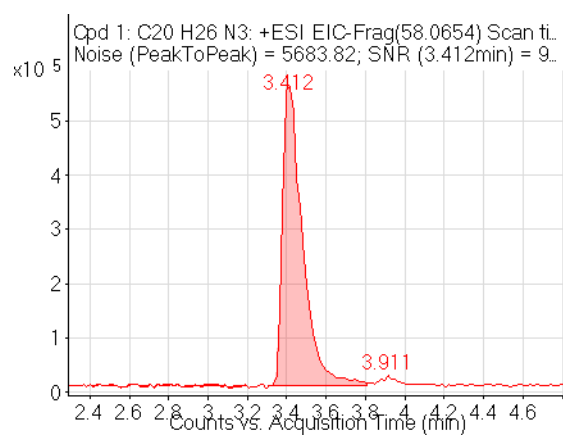

MS spectrum:

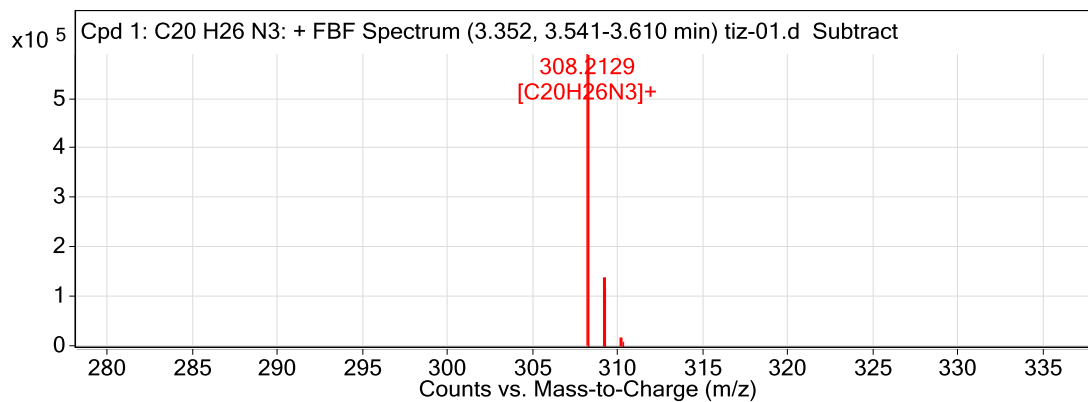

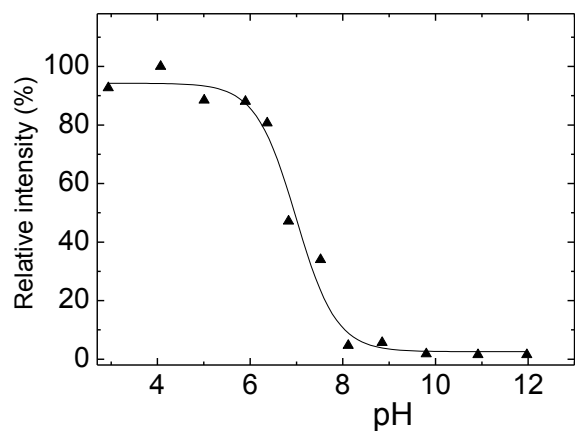

**Fig. S1** Relative fluorescence emission ( $I_F/I_{max}$ ) at 490 nm of Acr<sup>+</sup>-A ( $1.5 \times 10^{-5}$  M) in H<sub>2</sub>O as a function of pH.  $\lambda_{exc} = 445$  nm.

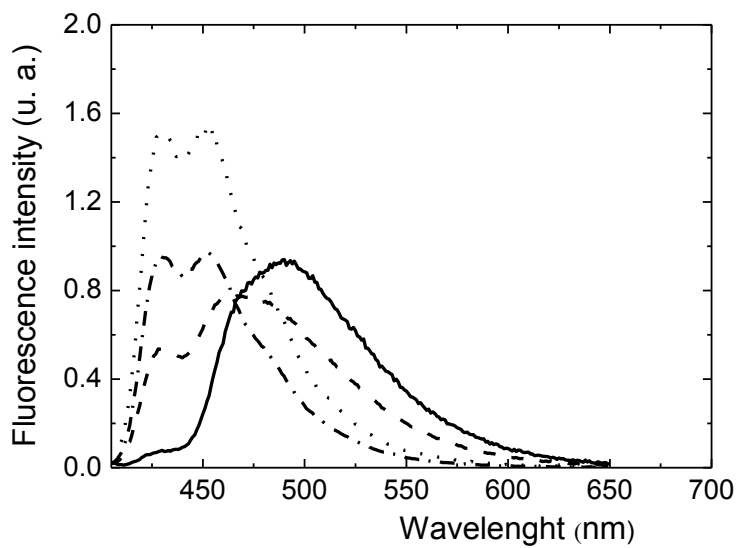

**Fig. S2** Fluorescence emission spectra of Acr<sup>+</sup>-A ( $1.5 \times 10^{-5}$  M) in water recorded at pH 2.91 (solid line), 6.00 (dashed line), 8.84 (dashed and dotted line) and 11.11 (dotted line),  $\lambda_{exc} = 355$  nm.



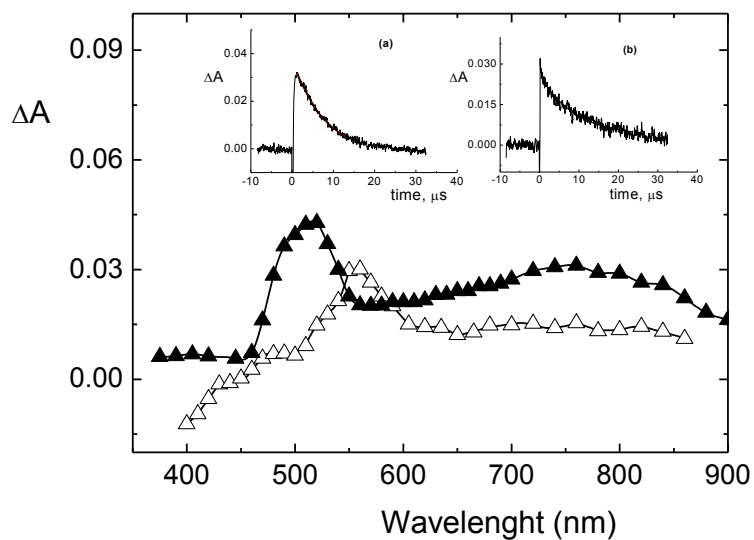

**Fig. S3** Absorption spectra of Acr<sup>+</sup>-A ( $5.5 \times 10^{-4}$  M) in N<sub>2</sub>-saturated H<sub>2</sub>O recorded 1.1 μs after the laser pulse at pH 8.0 (▲) and 12.0 (△);  $\lambda_{\text{exc}} = 355$  nm. Inset: decays recorded at 510 (a) and 750 nm (b) in N<sub>2</sub>-saturated solution at pH 8.0.

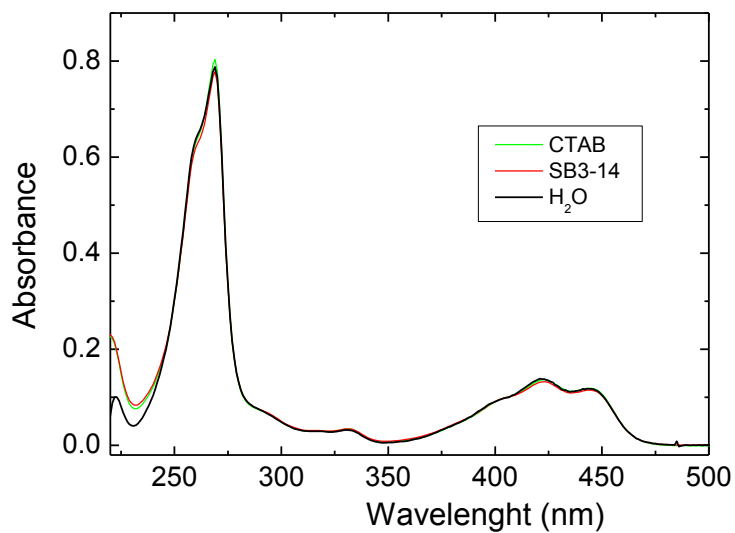

**Fig. S4** Absorption spectra of Acr<sup>+</sup>-A ( $1.6 \times 10^{-5}$  M) at pH 5.90 recorded in H<sub>2</sub>O, 0.01 M CTAB and 0.01 M SB3-14.

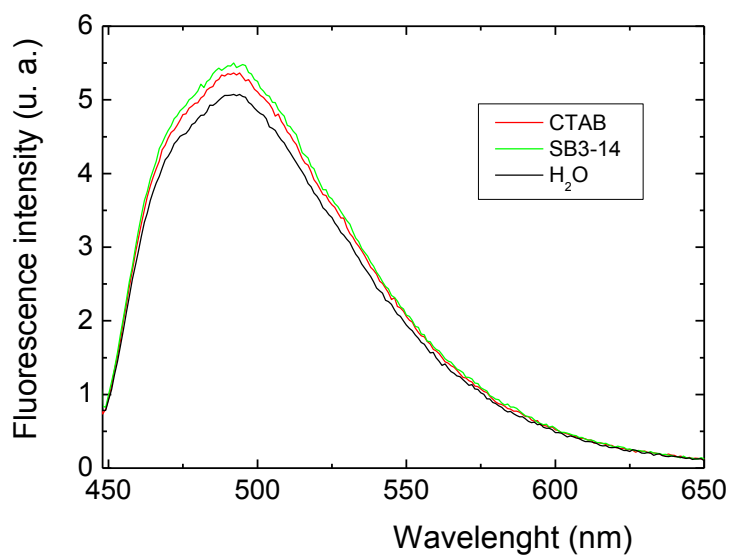

**Fig. S5** Fluorescence spectra of Acr<sup>+</sup>-A ( $1.6 \times 10^{-6}$  M) at pH 5.90 recorded in H<sub>2</sub>O, 0.01 M CTAB and 0.01 M SB3-14;  $\lambda_{\text{exc}} = 445$  nm.

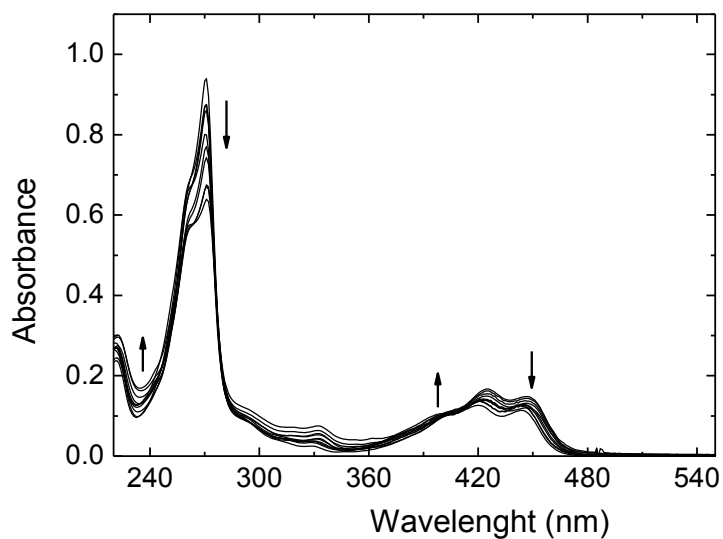

**Fig. S6** Absorption spectra of Acr<sup>+</sup>-A ( $1.6 \times 10^{-5}$  M) recorded in 0.01 M SDS at different pH values (2.96÷11.23); the arrows are in the direction of decreasing pH.

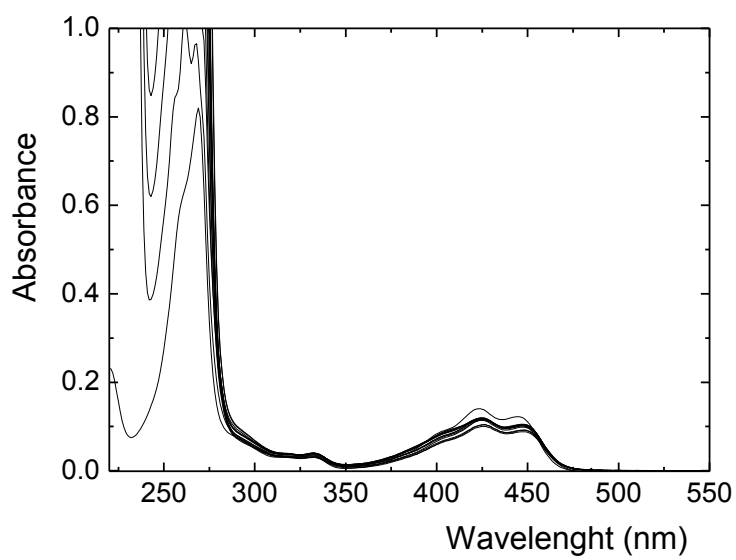

**Fig. S7** Absorption spectra of Acr<sup>+</sup>-A ( $1.6 \times 10^{-5}$  M) recorded in 0.02 M SOBS at different pH values (2.79-11.80).

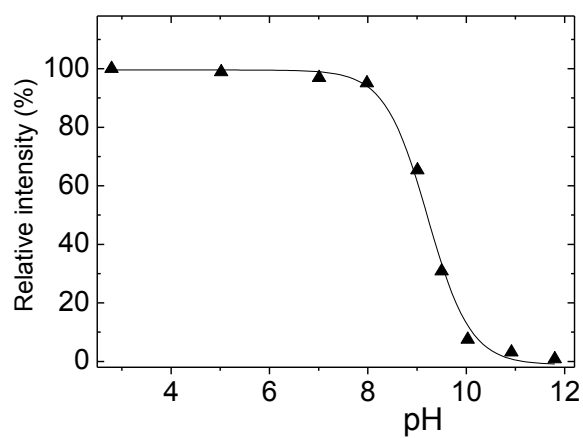

**Fig. S8** Relative fluorescence emission ( $I_F/I_{\max}$ ) at 490 nm of Acr<sup>+</sup>-A ( $1.5 \times 10^{-5}$  M) in the presence of SDS (0.01 M) as a function of pH.  $\lambda_{\text{exc}}$  = 445 nm.

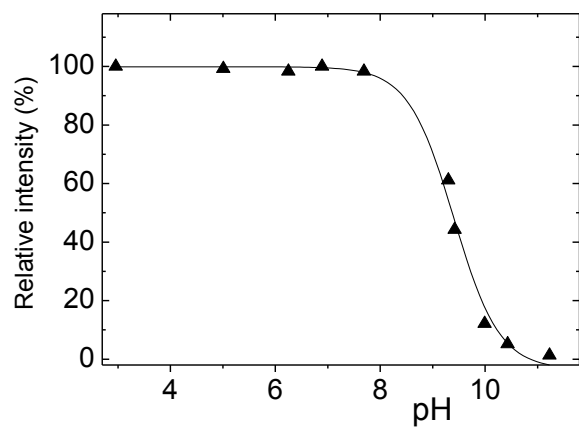

**Fig. S9** Relative fluorescence emission ( $I_f/I_{max}$ ) at 490 nm of Acr<sup>+</sup>-A ( $1.5 \times 10^{-5}$  M) in the presence of SOBS (0.02 M) as a function of pH.  $\lambda_{exc}$  = 445 nm.
